1                    **Empagliflozin reduces renal lipotoxicity in experimental Alport syndrome**

2    **Authors:**

3    Mengyuan Ge<sup>1,2</sup>, Judith Molina<sup>1,2</sup>, Jin-Ju Kim<sup>1,2</sup>, Shamroop K Mallela<sup>1,2</sup>, Anis Ahmad<sup>3</sup>, Javier  
4    Varona Santos<sup>1,2</sup>, Hassan Al-Ali<sup>1,2</sup>, Alla Mitrofanova<sup>1,2</sup>, Kumar Sharma<sup>4</sup>, Flavia Fontanesi<sup>5</sup>, Sandra  
5    Merscher<sup>1,2</sup>, Alessia Fornoni<sup>\*1,2</sup>

6

7    **Affiliations:**

8    1. Katz Family Division of Nephrology and Hypertension, Department of Medicine, University of  
9    Miami Miller School of Medicine, Miami, Florida.

10    2. Peggy and Harold Katz Family Drug Discovery Center, University of Miami Miller School of  
11    Medicine, Miami, Florida.

12    3. Department of Radiation Oncology, University of Miami Miller School of Medicine, Miami,  
13    Florida.

14    4. Center for Precision Medicine, School of Medicine, University of Texas Health San Antonio,  
15    San Antonio, Texas.

16    5. Department of Biochemistry and Molecular Biology, University of Miami, Miami, Florida.

17    **\*Corresponding author**

18    Alessia Fornoni, MD, PhD at the Katz Family Division of Nephrology and Hypertension and Peggy  
19    and Harold Katz Family Drug Discovery Center, University of Miami, 1580 NW 10th Ave, Miami,  
20    FL 33136, USA (email: [afornoni@med.miami.edu](mailto:afornoni@med.miami.edu); tel.+1-305-243-7745; fax+1-305-243-3506).

21

22    **Abstract**

23    Sodium-glucose cotransporter-2 inhibitors (SGLT2i) are anti-hyperglycemic agents that prevent  
24    glucose reabsorption in proximal tubular cells. SGLT2i improves renal outcomes in both diabetic  
25    and non-diabetic patients, indicating it may have beneficial effects beyond glycemic control. Here,  
26    we demonstrate that SGLT2i affects energy metabolism and renal lipotoxicity in experimental

1 Alport syndrome (AS). *In vitro*, we found that SGLT2 protein expression levels in human and  
2 mouse podocytes were similar to tubular cells. Newly established immortalized podocytes from  
3 Col4a3 knockout mice (AS podocytes) accumulate lipid droplets along with increased apoptosis  
4 when compared to wildtype podocytes. Treatment with SGLT2i empagliflozin reduces lipid droplet  
5 accumulation and apoptosis in AS podocytes. Empagliflozin inhibits the utilization of  
6 glucose/pyruvate as a metabolic substrate in AS podocytes. *In vivo*, we demonstrate that  
7 empagliflozin reduces albuminuria and prolongs the survival of AS mice. Empagliflozin-treated  
8 AS mice show decreased serum blood urea nitrogen and creatinine levels in association with  
9 reduced triglyceride and cholesterol ester content in kidney cortices when compared to AS mice.  
10 Lipid accumulation in kidney cortices correlates with the decline in renal function. In summary,  
11 empagliflozin reduces renal lipotoxicity and improves kidney function in experimental AS in  
12 association with the energy substrates switch from glucose to fatty acids in podocytes.

13

14 **Keywords:** Alport syndrome; SGLT2 inhibitor; lipid; energy substrate.

15

## 1 **Introduction**

2 Alport syndrome (AS) is a hereditary disease of glomerular basement membranes caused by  
3 mutations in collagen type IV genes A3, A4 and A5 (Barker et al., 1990; Gross et al., 2016; Longo  
4 et al., 2002). AS is characterized by renal fibrosis with progression to end-stage renal disease in  
5 young adult life (Barker et al., 1990; Grunfeld, 2000; Williamson, 1961). Though early treatment  
6 with angiotensin-converting enzyme inhibitors (ACEi) was shown to reduce proteinuria and delay  
7 disease progression in both retrospective (Gross et al., 2012) and prospective (Boeckhaus et al.,  
8 2022) studies, there is no specific treatment to prevent renal failure in patients with AS.

9 Sodium-glucose cotransporter 2 inhibitors (SGLT2i), initially developed for the treatment of  
10 patients with type 2 diabetes (T2D), were recently found to protect from kidney and cardiovascular  
11 outcomes in both diabetic and non-diabetic patients with chronic kidney disease (CKD)  
12 (Heerspink et al., 2020). SGLT2 is most abundantly expressed in the apical brush border  
13 membrane of the proximal tubule, where it plays a key role in renal glucose reabsorption (Vallon  
14 et al., 2011). SGLT2i selectively block SGLT2, thereby enhancing urinary glucose excretion and  
15 reducing glycemia (DeFronzo, Norton, & Abdul-Ghani, 2017; Novikov & Vallon, 2016; Vallon &  
16 Thomson, 2017). While the major mechanism for renoprotection is thought to involve the  
17 tubuloglomerular feedback and glomerular hemodynamics (Cherney et al., 2014), SGLT2i may  
18 also modulate key metabolic pathways linked to CKD progression. In response to increased  
19 glycosuria, the body engenders a metabolic adaption to enhance the usage of fat for energy  
20 production (Ferrannini et al., 2016). Additional studies have also shown that SGLT2i enhances  $\beta$ -  
21 oxidation in the liver (Wallenius et al., 2022) and improves liver fat deposition in patients with T2D  
22 and fatty liver disease (Kuchay et al., 2018; Shibuya et al., 2018). Similarly, SGLT2i lowers the  
23 cardiac content of cardiotoxic lipids in obese diabetic rats (Aragon-Herrera et al., 2019). These  
24 observations suggest a possible link between SGLT2i and lipid metabolism. We and others have  
25 demonstrated that the accumulation of both cholesterol esters and fatty acids in podocytes and  
26 tubular cells contributes to the pathogenesis of AS (Ding et al., 2018; Kim et al., 2021; Mitrofanova

1 et al., 2018; Wright et al., 2021), indicating that reducing the lipid content in the kidney may  
2 potentially reduce lipotoxicity-mediated renal injury in AS.

3 Although all cells in the kidney are high energy-demanding, the metabolic substrates for ATP  
4 production are cell type-dependent (Console et al., 2020). Renal proximal tubular cells in  
5 particular use free fatty acids as the preferred fuel, whereas inhibition of fatty acid oxidation (FAO)  
6 renders tubular cells susceptible to cell death and lipid accumulation (Kang et al., 2015).  
7 Podocytes usually rely on glucose for energy production, while fatty acids are used as an  
8 alternative substrate (Abe et al., 2010; Brinkkoetter et al., 2019). Interestingly, a recent study  
9 demonstrated SGLT2 expression in podocytes and its expression was modulated by exposure to  
10 albumin, although the functional relevance of SGLT2 expression in podocytes is unknown (Cassis  
11 et al., 2018). With this study, we aimed at investigating if SGLT2i affects energy metabolism in  
12 both podocytes and tubular cells in experimental AS.

13

## 14 **Results**

15 **SGLT2 is expressed in human podocytes and immortalized podocytes established from**  
16 **wildtype (WT) and AS mice.** Immunohistochemistry in normal human kidney sections  
17 demonstrated both glomerular and proximal tubules expression of SGLT2 (Figure 1A). Using  
18 Western blot analysis, we demonstrate similar level of SGLT2 protein expression levels in cultured  
19 human podocytes when compared to HK2 tubular cells. Mouse liver lysate, HepG2 liver cancer  
20 cells and kidney lysate from SGLT2<sup>-/-</sup> mouse were used as the negative controls (Figure 1B). To  
21 study the effect of SGLT2i in an experimental model of non-diabetic kidney disease, we developed  
22 immortalized podocytes and tubular cell lines established from SV40<sup>+/+</sup>;Col4a3<sup>+/+</sup> (immorto-WT)  
23 and SV40<sup>+/+</sup>;Col4a3<sup>-/-</sup> (immorto-AS) mice. The expression of the podocyte-specific marker  
24 Synaptopodin (SYNPO) and of the tubule-specific marker Aquaporin 1 (AQP1) was confirmed in  
25 podocyte and tubular cell lines, respectively (Figure 1-Figure supplement 1). We found a similar  
26 level of SGLT2 protein expression in both tubular cells and podocytes (Figure 1C). SGLT2

1 expression in both AS tubular cells and podocytes was not different from WT controls (Figure 1D).  
2 **Treatment of AS podocytes with empagliflozin reduces lipid droplet accumulation and**  
3 **apoptosis.** We previously described that AS podocytes are characterized by increased apoptosis  
4 and lipid droplet (LD) accumulation when compared to WT podocytes (Kim et al., 2021; Liu et al.,  
5 2020). To further evaluate whether SGLT2i can reduce lipotoxicity in podocytes as well as in  
6 tubular cells isolated from AS mice, immortalized WT and AS podocytes and tubular cells were  
7 treated with empagliflozin or vehicle. We found increased cytotoxicity, although not significant, in  
8 AS compared to WT tubular cells. However, SGLT2i significantly decreases cytotoxicity in  
9 empagliflozin-treated compared with vehicle-treated AS tubular cells (Figure 2A). No differences  
10 in apoptosis and lipid droplet accumulation were observed in any of the groups (Figure 2B,E). As  
11 expected, AS podocytes showed increased cytotoxicity, apoptosis, and intracellular LD when  
12 compared to WT podocytes (Figure 2C,D,F). Empagliflozin treatment significantly reduced  
13 apoptosis and intracellular LD, but not cytotoxicity in AS podocytes (Figure 2C,D,F).  
14 Representative picture of Nile red staining revealed fewer LD per cell in empagliflozin-treated  
15 compared with vehicle-treated AS podocytes (Figure 2H), suggesting empagliflozin ameliorates  
16 lipotoxicity in AS podocytes. Interestingly, we observed a positive correlation between LD  
17 accumulation and apoptosis (Figure 2G).

### 18 **Empagliflozin inhibits the utilization of pyruvate as a metabolic substrate in AS podocytes.**

19 To investigate if empagliflozin affects metabolic substrate preferences, endogenous cellular and  
20 coupled substrate-driven respiration were measured by high-resolution respirometry.  
21 Endogenous respiration measured in intact cells was not altered in either AS tubular cells or  
22 podocytes compared to WT (Figure 3A,B). Cells were then permeabilized with digitonin and  
23 substrates for fatty acids-driven and NADH-driven respiration were provided sequentially. No  
24 difference in oxygen consumption rate (OCR) was detected between WT and AS tubular cells in  
25 response to fatty acids. However, AS tubular cells show elevated respiration after the addition of  
26 NADH-linked substrates. Treatment of empagliflozin did not affect the respiration of AS tubular

1 cells independently of the substrate (Figure 3A). In contrast to tubular cells, AS podocytes showed  
2 a slightly but significant increase in FAO-linked OCR compared to WT podocytes, which could be  
3 due to the increase in intracellular lipid accumulation. This increase was maintained upon  
4 empagliflozin treatment and showed a tendency to increase, though not significant (Figure 3B).  
5 Moreover, addition of NADH-linked substrates to WT and AS podocytes increased OCR to  
6 approximately the double of the value recorded in presence of FAO-linked substrates, in  
7 agreement with podocytes preferential use of glucose oxidation for ATP production. Interestingly,  
8 NADH-linked respiration in AS podocytes was inhibited by treatment with empagliflozin (Figure  
9 3B). To confirm the inhibitory effect of empagliflozin on NADH-driven respiration, we repeated the  
10 assay by measuring directly NADH-driven respiration without addition of fatty acids. A similar  
11 change was observed (Figure 3-Figure supplement 1A,B). Taken together, these data suggest  
12 that in podocytes established from AS mice, empagliflozin may induce a metabolic remodeling  
13 characterized by a reduction in glucose oxidation and a switch toward the use of alternative  
14 substrates for ATP production. To further characterize the adaptation to energy sources in AS  
15 podocytes, pyruvate dehydrogenase (PDH) activity was measured. PDH is an enzyme that  
16 converts glycolysis-derived pyruvate to acetyl-CoA and increases its influx into the tricarboxylic  
17 acid (TCA) cycle (Zhang, Hulver, McMillan, Cline, & Gilbert, 2014). PDH plays a central role in  
18 the reciprocal regulation of glucose and lipid oxidation (Zhang et al., 2014). We found that PDH  
19 activity was reduced in AS podocytes by Empagliflozin treatment (Figure 3C), suggesting a switch  
20 to the consumption of fatty acids as energy fuel.

21 **Empagliflozin prolongs survival of AS mice.** To investigate if empagliflozin can improve  
22 survival in mice with non-diabetic renal disease which typically die from renal failure, AS mice  
23 were fed an empagliflozin-supplemented chow (70 mg/kg) or a regular diet starting at 4 weeks of  
24 age for 6 weeks. Mice with experimental AS start developing proteinuria at 4 weeks of age,  
25 followed by death at 8-9 weeks of age. We found that empagliflozin extended the lifespan of AS  
26 mice by about 22% compared to untreated AS mice (Figure 4A). Blood glucose was measured at

1 8 weeks of age and no difference was observed in empagliflozin-treated compared to untreated  
2 AS mice (Figure 4B). These data suggest that the ability of empagliflozin to prolong the survival  
3 of AS mice is independent from its anti-hyperglycemic effects.

4 **Empagliflozin improves renal function in a mouse model of Alport syndrome.** To study the  
5 effects of SGLT2 inhibitors on the renal outcome, AS mice were fed empagliflozin-supplemented  
6 chow starting at 4-weeks of age for 4 weeks, and the renal phenotype was compared to AS mice  
7 fed a regular diet. Ramipril, an ACEi and used as a standard of care for patients with AS, was  
8 also used alone or in combination with empagliflozin. At 4-weeks of age, ramipril was added to  
9 the drinking water and/or mice were fed with an empagliflozin-supplemented chow as indicated.  
10 Mice on the different regimens were compared with AS mice fed a regular diet. All mice were  
11 sacrificed at 8-week of age. Empagliflozin, ramipril and the empagliflozin + ramipril (E+R)  
12 combination significantly reduced the albumin-to-creatinine ratio (ACR) and prevented body  
13 weight loss in AS mice (Figure A,B). Empagliflozin, ramipril and E+R significantly reduced blood  
14 urea nitrogen (BUN) and creatinine levels in AS mice (Figure 5 C,D). Unlike what has been  
15 observed in patients enrolled in DAPA-CKD, addition of empagliflozin to standard of care (SOC)  
16 ramipril did not confer additional renoprotection, and overall, no difference across treatment  
17 groups was observed. Glomeruli of AS mice exhibited significant mesangial matrix expansion  
18 (Figure 5E) as determined by Periodic acid-Schiff (PAS) staining and significantly increased  
19 fibrosis as determined by Picrosirius red staining (Figure 5F), which were reduced by the  
20 treatment of empagliflozin, ramipril and E+R. Empagliflozin, ramipril and E+R treatment of AS  
21 mice also prevented podocyte loss as suggested by similar podocyte numbers, as indicated by  
22 increased Wilms tumor 1 (WT1)-positive cells per glomerulus, in treated AS compared to WT mice  
23 (Figure 5G).

24 **Empagliflozin prevents renal lipid accumulation in experimental Alport syndrome.** To  
25 investigate whether empagliflozin prevents lipid accumulation in kidney cortices of AS mice, Oil  
26 Red O (ORO) staining was performed. We found an increased number of LD-positive glomeruli

1 in AS mice, while the number of LD-positive glomeruli in all treatment groups was similar to WT  
2 mice (Figure 6A). We then extracted lipids from kidney cortices to investigate the composition of  
3 specific lipids and found increased cholesterol ester (CE) and triglyceride contents in AS  
4 compared to WT mice (Figure 6B,D), similar to what we previously reported (Kim et al., 2021).  
5 Interestingly, though all treatment groups showed a decreased CE content in kidney cortices, only  
6 Empagliflozin and E+R reduced triglycerides levels. The total cholesterol content was similar in  
7 all five groups (Figure 6C). We previously demonstrated a correlation between lipid accumulation  
8 and renal function decline in experimental models of metabolic and non-metabolic kidney disease  
9 (Ducasa et al., 2019; Ge et al., 2021; Wright et al., 2021). Similarly, we found a positive correlation  
10 of the CE, triglyceride content in kidney cortices with ACR, serum BUN, and creatinine levels  
11 (Figure 6E-J).

12

### 13 **Discussion**

14 In the present study, we investigate the mechanisms by which empagliflozin, an SGLT2i, affects  
15 the usage of glucose and fatty acids as energy substrates in podocytes and tubular cells as well  
16 as the effects of empagliflozin on lipotoxicity-induced cell injury and renal function decline. The  
17 expression of SGLT2 in podocytes has been previously reported by Cassis et al (Cassis et al.,  
18 2018), suggesting that podocytes can be a potential target of SGLT2i. Similarly, we demonstrate  
19 that SGLT2 protein is expressed in human kidney cortex, cultured human podocytes, as well as  
20 healthy and diseased mouse podocytes (Figure 1). We also show that SGLT2i reduces LD  
21 accumulation (Figure 2) and glucose/pyruvate-driven respiration (Figure 3) in immortalized  
22 podocytes established from AS mice. *In vivo*, we demonstrate for the first time that empagliflozin  
23 reduces renal lipotoxicity and prevents kidney disease progression in an experimental model of  
24 AS.

25 Renal lipotoxicity contributes to the pathogenesis of several forms of kidney disease (Ducasa et  
26 al., 2019; Pedigo et al., 2016; Yoo et al., 2015). We previously demonstrated that impaired



1 cholesterol efflux in podocytes plays a critical pathogenic role in diabetic kidney disease (DKD)  
2 (Ducasa et al., 2019; Merscher-Gomez et al., 2013) as well as in diseases of non-metabolic origin,  
3 including AS (Kim et al., 2021; Mitrofanova et al., 2018), where we have also observed altered  
4 free fatty acids metabolism. Others have reported that defective FAO is associated with lipid  
5 deposition and fibrosis in kidney tubules (Kang et al., 2015), and contributes to disease  
6 progression in AS (Ding et al., 2018). In this study, we utilized immortalized podocytes and tubular  
7 cells newly established from AS and WT mice. Proximal tubular cells are a known target of  
8 SGLT2i. Here, we aimed at investigating if podocytes and tubular cells change their preferences  
9 with regard to their metabolic fuel in response to SGLT2i. In the kidney, podocytes highly rely on  
10 glucose as the substrate for ATP production (Abe et al., 2010), while tubular cells use free fatty  
11 acid as the preferred energy source (Kang et al., 2015). Therefore, a reduction of glucose  
12 availability by SGLT2i may trigger the utilization of alternative energy substrates, such as lipids  
13 (Osataphan et al., 2019). To study the effect of SGLT2i on energy substrate switch, we first  
14 investigated whether SGLT2i exercises a protective effect on immortalized podocytes and tubular  
15 cells derived from AS mice. We demonstrate that AS podocytes have increased cytotoxicity and  
16 apoptosis when compared to WT podocytes (Figure 2). Empagliflozin treatment protected AS  
17 podocytes from apoptosis but not cytotoxicity. On the other hand, AS tubular cells did not show  
18 increased apoptosis but were found to exhibit a tendency to increased cytotoxicity when  
19 compared to WT tubular cells. Tubular cytotoxicity was significantly reduced by empagliflozin  
20 treatment. The apparent discrepancy between cytotoxicity and apoptosis could be explained by  
21 the fact that apoptosis is a coordinated and energy-reliant process that involves the activation of  
22 caspases, while cell death characterized by loss of cell membrane integrity (which was measured  
23 in our cytotoxicity assay) is energy-independent (Cummings & Schnellmann, 2004), therefore the  
24 two processes can take place independently, sequentially, as well as concurrently (Elmore, 2007).  
25 Interestingly, we observed a similar trend with regard to LD accumulation. We found a significantly  
26 increased number of LDs in AS podocytes compared to WT podocytes, which was reduced by

1 empagliflozin treatment. However, no difference in LD accumulation was observed in tubular cells  
2 (Figure 2), suggesting that the mechanisms leading to LD accumulation in podocytes in AS are  
3 cell-specific. As podocytes but not tubular cells in AS are in contact with an abnormal glomerular  
4 basement membrane, the possibility that the LD accumulation is the result of a cross talk between  
5 matrix and lipid metabolism is possible, as it was recently suggested by others (Romani et al.,  
6 2019). As far as the mechanisms linking a similar trend in LD accumulation and apoptosis, it was  
7 reported that lipids such as triglyceride, cholesterol, fatty acids and ceramide can directly induce  
8 caspase activation, leading to programmed cell death (Huang & Freter, 2015). The exact  
9 mechanism by which lipotoxicity induce apoptosis warrants further investigations.

10 To test the preference of energy substrate in association with AS and empagliflozin treatment, we  
11 measured cellular respiration by high-resolution respirometry (Figure 3). After permeabilizing the  
12 cells, we sequentially added different substrates and observed their direct effect on oxygen  
13 consumption. WT and AS tubular cells consume the same amount of oxygen in presence of FAO-  
14 linked substrates. However, AS tubular cells respire more following the addition of NADH-linked  
15 substrates. While not the major source of renal energy, glucose oxidation is crucial in tubular  
16 function (Ross, Espinal, & Silva, 1986). Elevated NADH-linked respiration in AS tubular cells may  
17 suggest an increased demand for alternative substrates in this cell type under disease conditions.  
18 Empagliflozin does not affect tubular cell respiration independently of the substrate used in the  
19 assay. However, empagliflozin treatment of AS podocytes inhibits NADH-linked respiration and  
20 appears to promote a shift in substrate utilization for ATP production. The accumulation of LD in  
21 AS podocytes could lead to an increase in the availability of fatty acids and contribute to the  
22 elevated FAO-linked respiration observed in these cells. Given that podocytes rely more on  
23 glucose oxidation and are therefore more vulnerable to glucose deprivation, it is feasible to  
24 speculate that empagliflozin only affects podocyte respiratory metabolism and not that of tubular  
25 cells.

26 While the major mechanisms by which SGLT2i reduces albuminuria is thought to be linked to a

1 modulation of the tubulo-glomerular feedback resulting in improved glomerular hyperfiltration  
2 (Mabillard & Sayer, 2020), it is possible that additional mechanisms are also involved. Several  
3 studies have demonstrated that SGLT2i has a remarkable effect on lipid metabolism *in vivo*. For  
4 example, SGLT2 inhibition modulates renal lipid metabolism in db/db mice (Wang et al., 2017),  
5 ameliorates obesity in high-fat diet-fed animal models by improving FAO (Wei et al., 2020; Yokono  
6 et al., 2014), and reduces the cardiotoxic lipids in the hearts of diabetic fatty rats (Aragon-Herrera  
7 et al., 2019). In this study, we demonstrate that empagliflozin treatment protects from renal  
8 disease progression and expands the life span of AS mice. We furthermore demonstrate that  
9 empagliflozin not only improves kidney function (Figure 5) but also significantly reduces intrarenal  
10 lipid accumulation (Figure 6) in AS mice. To allow for comparison to the SOC, the ACEi ramipril  
11 was also included in our study in order to determine whether a combination of empagliflozin and  
12 ramipril would have a superior effect to ramipril. We show that treatment of AS mice with both  
13 ramipril and empagliflozin is not superior in preserving renal function when compared to treatment  
14 with ramipril alone. While this is not consistent with the findings reported in patients with DKD, the  
15 very sizable effect of ramipril in experimental AS may account for the inability to report additional  
16 renoprotective effects of empagliflozin. Interestingly, we found that empagliflozin or the combined  
17 treatment of empagliflozin and ramipril reduces triglyceride content in the kidney of AS mice, while  
18 ramipril did not have any effect on the renal triglyceride content but affected esterified cholesterol  
19 content, suggesting that the effect of ACEi and SGLT2i on renal lipid metabolism may differ. More  
20 importantly, we identified a strong correlation between lipid accumulation (CE, triglyceride) in  
21 kidney cortices and the decline in renal function (albuminuria, serum BUN and creatinine), which  
22 is similar to our previous findings in experimental AS, DKD and FSGS (Ducasa et al., 2019; Ge  
23 et al., 2021; Wright et al., 2021). These data suggest that the renal protection of empagliflozin in  
24 AS may at least in part be mediated by its ability to modulate renal lipid metabolism. It is interesting  
25 to note that while podocyte-specific glucose transporter (GLUT) 4 deficient podocytes are  
26 characterized by morphology change which may be mediated by the lack of nutrient (Guzman et

1 al., 2014), GLUT4-deficient mice are protected from diabetic nephropathy. The beneficial effect  
2 of GLUT4 deficiency and SGLT2 inhibition may both be interpreted by deprivation of nutrients  
3 such as glucose. Further studies will be needed to understand the impact of renal lipid content in  
4 affected patients and to determine if renoprotection conferred by SGLT2i may be monitored  
5 through non-invasive measures of fat content such as Dixon magnetic resonance imaging  
6 (Gaborit et al., 2021).

7 Our study has several limitations. First, we did not study empagliflozin's off-target effect on other  
8 transporters such as sodium-hydrogen exchanger (NHE) 1 in the heart or NHE3 in the kidney  
9 (McGuire et al., 2021). It is possible that these pathways are also involved. However, recent study  
10 shows that empagliflozin does not inhibit NHE1 in the heart (Chung et al., 2021), and the way  
11 SGLT2i inhibit the NHE isoforms in the kidney remains to be proven (De Pascalis, Cianciolo,  
12 Capelli, Brunori, & La Manna, 2021). In addition, *in vitro* experiments were performed using  
13 immortalized podocytes and tubular cells established from AS and WT mice. While these cells  
14 are very similar to primary cells, they may exhibit some changes in protein expression and  
15 function. However, the *in vivo* study using an experimental model of non-metabolic kidney disease  
16 (AS mice) supports our hypothesis.

17 In summary, our study demonstrates that empagliflozin reduces renal lipotoxicity and improves  
18 kidney function in experimental AS. This beneficial effect is associated with a shift in the use of  
19 energy substrates from glucose to fatty acids in podocytes. Lipid accumulation in kidney cortices  
20 correlates with kidney disease progression, therefore reducing renal lipid content by empagliflozin  
21 and other agents may represent a novel therapeutic strategy for the treatment of patients with AS.  
22 Results obtained from *this* study may allow us to better define the mechanisms leading to SGLT2i-  
23 mediated renoprotection in non-diabetic kidney disease.

24

## 25 **Methods**

### 26 **Animal studies**

## 1 **Phenotypic analysis of mice**

2 Col4a3<sup>-/-</sup> mice (a model of AS) are in a 129X1/SvJ background and were purchased from Jackson  
3 Laboratory (129-Col4a3<sup>tm1Dec</sup>/J, stock #002908). Mice were fed empagliflozin-supplemented chow  
4 (70 mg/kg) versus a regular diet starting at 4 weeks of age. Ramipril was added to the drinking  
5 water at a concentration that would lead to a daily uptake of 10 mg/kg body weight (Kim et al.,  
6 2021). Five groups of mice were examined: WT + placebo, AS + placebo, AS + empagliflozin, AS  
7 + ramipril and AS + empagliflozin + ramipril. Both male and female mice were used. Mice were  
8 sacrificed at 8 weeks and analyzed as described below.

## 9 **Urinary albumin-to-creatinine ratios**

10 Morning spot urine samples were collected bi-weekly. Urinary albumin-to-creatinine ratios were  
11 determined using the Mouse Albumin ELISA Kit (Bethyl Laboratories, Montgomery, TX) and  
12 Creatinine LiquiColor (Stanbio, Boerne, TX). Albuminuria values are expressed as µg albumin per  
13 mg creatinine.

## 14 **Serology**

15 Blood samples were collected and serum creatinine was determined by tandem mass  
16 spectrometry at the UAB-UCSD O'Brian Core Center (University of Alabama at Birmingham) as  
17 previously described (Takahashi, Boysen, Li, Li, & Swenberg, 2007). Serum BUN was analyzed  
18 in the Comparative Laboratory Core Facility of the University of Miami.

## 19 **Oil red-O staining**

20 Four µm kidney cortices optimal cutting temperature (OCT) compound embedded sections were  
21 incubated with 100 µl freshly prepared Oil Red O solution (Electron Microscopy Science, Hatfield,  
22 PA) for 15 minutes and counterstained with Hematoxylin Harris solution (VWR, 10143-606) for 5  
23 min to detect lipid deposition. Images were examined under a light microscope (Olympus BX41,  
24 Tokyo, Japan), and quantified by the percentage of LD-positive glomeruli.

## 25 **Podocyte Wilms tumor 1 (WT1) staining**

1 To measure podocyte number per glomerulus, glomerular sections embedded in OCT were  
2 stained with a WT1 antibody (Santa Cruz Biotechnology, Dallas, TX, sc-192, 1:300), followed by  
3 a secondary antibody (Invitrogen, Waltham, MA, A-11008, 1:500) and Mounting Medium with  
4 DAPI (Vectorlabs, Newark, CA, H-1200). Images were acquired using Olympus IX81 confocal  
5 microscope (Tokyo, Japan) coupled with a 60x oil immersion objective lens and images were  
6 processed using Fiji/Image J. 5-10 glomeruli per mouse were quantified.

### 7 **Kidney histology analysis**

8 Perfused kidneys were fixed in 10% formalin and paraffin-embedded, and then cut into 4  $\mu\text{m}$  thick  
9 sections. Periodic acid-Schiff (PAS) staining was performed to investigate mesangial expansion  
10 following a standard protocol. The mesangial expansion was visualized under a light microscope  
11 (Olympus BX41, Tokyo, Japan) and 20 glomeruli per section were scored by semi-quantitative  
12 analysis (scale 0-5), performed in a blinded manner. Picrosirius Red staining was performed to  
13 measure fibrosis. Paraffin-embedded sections were deparaffinized with xylene and a graded  
14 alcohol series. Sections were rinsed and stained for 1 hour with Picrosirius Red in saturated  
15 aqueous picric acid. Sections were examined under a light microscope (Olympus BX41, Tokyo,  
16 Japan), followed by analysis with Fiji/Image J.

### 17 **Lipid extraction**

18 Kidney cortices were homogenized in a buffer containing 50 mM pH 7.4 potassium phosphate  
19 and cOmplete Protease Inhibitor Cocktail tablet (Roche, Indianapolis, IN, 1 pill in 10 ml buffer) by  
20 sonication for 20s, twice, on ice. Total lipids were extracted from homogenates using  
21 hexane:isopropanol (3:2) and placed in a mixer (1000 rpm) for 30 min. The mixed homogenate  
22 was then spun at top speed, lipids contained in the supernatants were collected, and pellets were  
23 disrupted by 2 sequential lipid extractions. Total lipids were then pooled and dried using a speed  
24 vacuum at 37 °C and reconstituted with 100  $\mu\text{l}$  isopropanol:NP-40 (9:1). Proteins were extracted  
25 from the pellets using 8 M Urea, 0.1% SDS, and 0.1M NaOH. Extracted lipids were used for

1 determining total cholesterol, cholesterol ester and triglyceride contents, and normalized to  
2 protein concentrations.

### 3 **Triglyceride (TG) assay**

4 The TG content was determined using Triglyceride Colorimetric Assay Kit (Cayman, Ann Arbor,  
5 MI) following the manufacturer's protocol. TG standards and lipid samples from above-mentioned  
6 extraction were added into a 96 well plate. The reaction was initiated by adding 150 µl enzyme  
7 buffer to each well. Absorbance at 540 nm was measured using a SpectraMax M5 plate reader  
8 (Molecular Devices, San Jose, CA).

### 9 **Cholesterol assay**

10 Cholesterol assays were performed using the Amplex Red Cholesterol Assay Kit (ThermoFisher  
11 Scientific, Waltham, MA) following the manufacturer's instructions with some modifications (Ge et  
12 al., 2021). Total cholesterol and cholesterol ester were quantified using a direct enzymatic method  
13 (Mizoguchi, Edano, & Koshi, 2004) and fluorescence was read at 530/580 nm. SpectraMax M5  
14 plate reader (Molecular Devices, San Jose, CA) was used.

### 15 **Immunohistochemistry**

16 Four µm kidney sections were heated at 65 °C for 1 hour and deparaffinized in xylene, followed  
17 by rehydration in decreasing concentrations of ethanol (two washes in 100% ethanol, two washes  
18 in 95%, one wash in 70%, one wash in 50%, and three wash in TBS). Antigen retrieval was  
19 performed for 30 min in citrate buffer (Sigma-Aldrich, St. Louis, MO, C9999, 1:10). Sections were  
20 incubated with 3% hydrogen peroxidase (Sigma-Aldrich, St. Louis, MO, H1009, 1:10) for 20 min  
21 and incubated with a blocking reagent (Vector Laboratories, Newark, CA, SP-5035) for 1 hour at  
22 room temperature. Sections were then incubated with primary antibody SGLT2 (Santa Cruz  
23 Biotechnology, Dallas, TX, sc-393350, 1:100) overnight at 4 °C. Incubation with biotin-labeled  
24 secondary antibody (Vector Laboratories, Newark, CA, BA-2000, 1:200) was performed at room  
25 temperature for 1 hour, followed by incubation with avidin-biotin peroxidase complex (Vector  
26 Laboratories, Newark, CA, PK-6100) and DAB substrate kit (Vector Laboratories, Newark, CA,

1 SK-4100). Counterstain was performed with hematoxylin for 5 min, followed by dehydration in  
2 increasing concentrations of ethanol. Sections were examined under a light microscope (Olympus  
3 BX41, Tokyo, Japan).

#### 4 **Establishment and culture of conditionally immortalized mouse podocyte and tubular cell** 5 **lines**

6 To establish immortalized mouse podocyte and tubular cell lines, Col4a3<sup>-/-</sup> mice were bred with  
7 the immorto-mice carrying a temperature-sensitive T-antigen transgene (SV40<sup>+/-</sup>) (Charles River,  
8 Wilmington, MA, CBA/CaxC57BL/10-H-2Kb-tsA58) (Jat et al., 1991) to generate double  
9 heterozygous littermates, which were then crossed to generate SV40Tg<sup>+/-</sup>;Col4a3<sup>-/-</sup> (immorto-AS)  
10 and SV40Tg<sup>+/-</sup>;Col4a3<sup>+/+</sup> (immorto-WT) (Kim et al., 2021; Liu et al., 2020). Glomeruli and tubules  
11 were isolated from 9 weeks old immorto-WT and -AS mice by differential sieving as previously  
12 described (Mundel et al., 1997; Terryn et al., 2007). Immortalized cell lines were cultured at 33 °C  
13 in RPMI growth medium (containing 10% FBS, 1% penicillin/streptomycin, 100 U/ml IFN $\gamma$ ) under  
14 permissive condition, then thermo-shifted to 37 °C non-permissive condition in the absence of  
15 IFN $\gamma$ . Immortalized mouse podocyte and tubular cell lines were characterized by Western blot  
16 analysis using podocyte and tubular cell markers. Cultured cells were incubated with 500 nM  
17 empagliflozin (Selleckchem, Houston, TX) or dimethylsulfoxide in growth medium for 48 h.

#### 18 **Western blot analysis**

19 Cell lysates were prepared using 3-[(3-cholamidopropyl)dimethylammonio]-1-propanesulfonic  
20 (CHAPS) acid buffer. Protein concentration was measured with the bicinchoninic acid (BCA)  
21 reagent (Thermo Scientific, Waltham, MA). 20-30  $\mu$ g of protein extract was loaded onto 4 to 20%  
22 SDS-polyacrylamide gel electrophoresis (SDS-PAGE) gels (Bio-Rad, Hercules, CA) and  
23 transferred to Immobilon-P PVDF membranes (Bio-Rad, Hercules, CA). Western blot analysis  
24 was performed using a standard protocol and the following primary antibodies: SGLT2 (Santa  
25 Cruz Biotechnology, Dallas, TX, sc-393350, 1:500), SYNAPTOPODIN (Santa Cruz  
26 Biotechnology, Dallas, TX, sc-21537, 1:1,000), AQP1 (Proteintech, Rosemont, IL, 20333-1-AP,



1 1:2000), GAPDH (Sigma-Aldrich, St. Louis, MO, CB1001, 1:10,000); or secondary antibodies:  
2 anti-mouse IgG horseradish peroxidase (HRP) (Promega, Madison, WI, W402B, 1:10,000), anti-  
3 rabbit IgG HRP (Promega, Madison, WI, W401B, 1:10,000) or anti-goat IgG HRP (Promega,  
4 Madison, WI, V805A, 1:10,000). Signal was detected with Radiance ECL (Azure, Dublin, CA)  
5 using Azure c600 Imaging System.

### 6 **Cytotoxicity and apoptosis assay**

7 Cytotoxicity and apoptosis assays were performed using the ApoTox-Glo Triplex assay  
8 (Promega, Madison, WI) according to the manufacturer's protocol. Fluorescence and  
9 luminescence were measured on a SpectraMax i3x multi-mode microplate reader (Molecular  
10 Devices, San Jose, CA).

### 11 **Lipid droplet quantification**

12 Cultured cells were fixed with 4% paraformaldehyde (PFA) and 2% sucrose and then stained with  
13 Nile red (Sigma-Aldrich, St. Louis, MO) and HCS Cell Mask Blue (Invitrogen, Waltham, MA)  
14 according to the manufacturer's protocols. Images were acquired using the Opera high content  
15 screening system (20x confocal lens) and lipid droplets intensity per cell was determined using  
16 the Columbus Image Analysis System (Perkin Elmer, Waltham, MA) (Liu et al., 2020).

### 17 **Cellular respiration measurements**

18 Oxygen consumption rate (OCR) was measured using a high-resolution respirometer (O2k-Fluo-  
19 Respirometer, Oroboros Instruments, Innsbruck, Austria) filled with 2 mL of mitochondrial  
20 respiration buffer (MiR05, containing 0.5 mM EGTA, 3 mM MgCl<sub>2</sub>·6H<sub>2</sub>O, 60 mM K-lactobionate,  
21 20 mM Taurine, 10 mM KH<sub>2</sub>PO<sub>4</sub>, 20 mM HEPES, 110 mM Sucrose, 1 g/l fatty acid-free BSA) at  
22 37°C, following the Substrate-Uncoupler-Inhibitor- Titration (SUIT)-002 protocol with some  
23 modifications. Specifically, 1x10<sup>6</sup> suspended cells were immediately placed into the chamber and  
24 continuously mixed by a stirrer at 750 rotations per minute. O<sub>2</sub> consumption in nearly diffusion-  
25 tight closed chambers is calculated in real-time by polarographic oxygen sensors. First,  
26 endogenous respiration was measured in intact cells. For substrate-driven respiration, cells were

1 permeabilized with 2.5 ug/ml digitonin (optimal digitonin concentration for podocytes and tubular  
2 cells was established prior following the SUIT-010 protocol) and supplemented with 2.5 mM ADP.  
3 FAO-linked substrates (0.5 mM octanoylcarnitine plus 0.1 mM malate) were then added to the  
4 chamber using a Hamilton microsyringe, and the coupled FA-driven OCR was measured. Finally,  
5 2 mM malate, 5 mM pyruvate and 10 mM glutamate were added to initiate coupled NADH-linked  
6 respiration, and the additive effect of NADH-driven OCR was measured. Mitochondrial outer  
7 membrane integrity was tested by addition of 10 uM cytochrome *c*. Respiration was inhibited by  
8 the addition of 100 mM sodium azide, which is a specific mitochondrial complex IV (CIV) inhibitor.  
9 Cell respiration was recorded as pmol O<sub>2</sub> consumed for 1 s and normalized to cell numbers.

#### 10 **Pyruvate dehydrogenase activity assay**

11 Pyruvate dehydrogenase (PDH) activity in cells was determined using PDH Colorimetric Assay  
12 Kit (BioVision, Milpitas, CA) according to manufacturer's protocol. 1x10<sup>6</sup> cells were used.  
13 Absorbance at 450 nm was measured using a SpectraMax M5 plate reader (Molecular Devices,  
14 San Jose, CA).

#### 15 **Statistics**

16 For each statistical test, biological sample size (*n*), and *p*-value are indicated in the corresponding  
17 figure legends. All values are presented as mean ± SD. Statistical analysis was performed using  
18 Prism GraphPad 7 software. Significant outliers were determined by GraphPad outlier calculator  
19 and excluded from further statistical analysis. Animals were grouped according to genotypes then  
20 randomized, and investigators were blinded for the analyses. When comparing two groups, a two-  
21 tailed Student's *t*-test was performed. Otherwise, results were analyzed using One-way ANOVA  
22 followed by Holm-Sidak's multiple comparison. A *p*-value less than 0.05 was considered  
23 statistically significant. Only data from independent experiments were analyzed.

#### 24 **Study Approval**

25 All studies involving mice were approved by the Institutional Animal Care and Use Committee  
26 (IACUC) at the University of Miami. The University of Miami (UM) has an Animal Welfare

1 Assurance on file with the Office of Laboratory Animal Welfare, NIH (A-3224-01, effective  
2 November 24, 2015). Additionally, UM is registered with the US Department of Agriculture Animal  
3 and Plant Health Inspection Service, effective December 2014, registration 58-R-007. As of  
4 October 22, 2013, the Council on Accreditation of the Association for Assessment and  
5 Accreditation of Laboratory Animal Care (AAALAC International) has continued UM's full  
6 accreditation.

7

### 8 **Author contributions**

9 MG performed the *in vitro* and *in vivo* experiments, analyzed the data, and wrote the manuscript.  
10 JM performed some *in vitro* experiments. JJK established immortalized podocytes and tubular  
11 cells. JVS and HAA designed experiments related to lipid droplet determination. SKM, AA, AM  
12 and KS assisted with some of the *in vivo* and *in vitro* experiments. KS edited the manuscript. AF  
13 conceived the project, FF, SM designed and supervised the study, analyzed the data, and edited  
14 the manuscript. AF is the guarantor of this work and, as such, had full access to all the data in the  
15 study and takes responsibility for the integrity of the data and the accuracy of the data analysis.

16

### 17 **Disclosure statement**

18 AF and SM are inventors on pending (PCT/US2019/032215; US 17/057,247;  
19 PCT/US2019/041730; PCT/US2013/036484; US 17/259,883; US17/259,883; JP501309/2021,  
20 EU19834217.2; CN-201980060078.3; CA2,930,119; CA3,012,773,CA2,852,904) or issued  
21 patents (US10,183,038 and US10,052,345) aimed at preventing and treating renal disease. They  
22 stand to gain royalties from their future commercialization. AF is Vice-President of L&F Health  
23 LLC and is a consultant for ZyVersa Therapeutics, Inc. ZyVersa Therapeutics, Inc has licensed  
24 worldwide rights to develop and commercialize hydroxypropyl-beta-cyclodextrin from L&F  
25 Research for the treatment of kidney disease. AF also holds equities in Renal 3 River Corporation.  
26 SM holds indirect equity interest in, and potential royalty from, ZyVersa Therapeutics, Inc. by

1 virtue of assignment and licensure of a patent estate. AF and SM are supported by Aurinia  
2 Pharmaceuticals Inc. KS is founder of SygnaMap.

3

#### 4 **Acknowledgement**

5 This project was supported by grants from National Institutes of Health [grant numbers  
6 R01DK117599, R01DK104753 and R01CA227493] to AF and SM, and the Miami Clinical  
7 Translational Science Institute [grant numbers U54DK083912, UM1DK100846, U01DK116101  
8 and UL1TR000460] to AF. FF is supported by the Army Research Office [grant number W911NF-  
9 21-1-0359]. We thank Dr Volker Vallon for the kidney lysate from SGLT2<sup>-/-</sup> mice. A special thanks  
10 to the Katz family for supporting this study.

11

#### 12 **Data availability**

13 All data generated or analyzed during this study are included in the manuscript and supporting  
14 files.

15

#### 16 **References**

17 Abe, Y., Sakairi, T., Kajiyama, H., Shrivastav, S., Beeson, C., & Kopp, J. B. (2010). Bioenergetic  
18 characterization of mouse podocytes. *Am J Physiol Cell Physiol*, 299(2), C464-476.  
19 doi:10.1152/ajpcell.00563.2009

20 Aragon-Herrera, A., Feijoo-Bandin, S., Otero Santiago, M., Barral, L., Campos-Toimil, M., Gil-  
21 Longo, J., . . . Lago, F. (2019). Empagliflozin reduces the levels of CD36 and cardiotoxic  
22 lipids while improving autophagy in the hearts of Zucker diabetic fatty rats. *Biochem*  
23 *Pharmacol*, 170, 113677. doi:10.1016/j.bcp.2019.113677

24 Barker, D. F., Hostikka, S. L., Zhou, J., Chow, L. T., Oliphant, A. R., Gerken, S. C., . . . Tryggvason,  
25 K. (1990). Identification of mutations in the COL4A5 collagen gene in Alport syndrome.  
26 *Science*, 248(4960), 1224-1227.

- 1 Boeckhaus, J., Hoefele, J., Riedhammer, K. M., Nagel, M., Beck, B., Choi, M., . . . Gross, O.  
2 (2022). Lifelong effect of therapy in young patients with the COL4A5 Alport missense variant  
3 p.(Gly624Asp): a prospective cohort study. *Nephrol Dial Transplant*.  
4 doi:10.1093/ndt/gfac006
- 5 Brinkkoetter, P. T., Bork, T., Salou, S., Liang, W., Mizi, A., Ozel, C., . . . Huber, T. B. (2019).  
6 Anaerobic glycolysis maintains the glomerular filtration barrier independent of mitochondrial  
7 metabolism and dynamics. *Cell Rep*, 27(5), 1551-1566 e1555.  
8 doi:10.1016/j.celrep.2019.04.012
- 9 Cassis, P., Locatelli, M., Cerullo, D., Corna, D., Buelli, S., Zanchi, C., . . . Zoja, C. (2018). SGLT2  
10 inhibitor dapagliflozin limits podocyte damage in proteinuric nondiabetic nephropathy. *JCI*  
11 *Insight*, 3(15). doi:10.1172/jci.insight.98720
- 12 Cherney, D. Z., Perkins, B. A., Soleymanlou, N., Maione, M., Lai, V., Lee, A., . . . von Eynatten,  
13 M. (2014). Renal hemodynamic effect of sodium-glucose cotransporter 2 inhibition in  
14 patients with type 1 diabetes mellitus. *Circulation*, 129(5), 587-597.  
15 doi:10.1161/CIRCULATIONAHA.113.005081
- 16 Chung, Y. J., Park, K. C., Tokar, S., Eykyn, T. R., Fuller, W., Pavlovic, D., . . . Shattock, M. J.  
17 (2021). Off-target effects of sodium-glucose co-transporter 2 blockers: empagliflozin does  
18 not inhibit Na<sup>+</sup>/H<sup>+</sup> exchanger-1 or lower [Na<sup>+</sup>]<sub>i</sub> in the heart. *Cardiovasc Res*, 117(14), 2794-  
19 2806. doi:10.1093/cvr/cvaa323
- 20 Console, L., Scalise, M., Giangregorio, N., Tonazzi, A., Barile, M., & Indiveri, C. (2020). The link  
21 between the mitochondrial fatty acid oxidation derangement and kidney injury. *Front*  
22 *Physiol*, 11, 794. doi:10.3389/fphys.2020.00794
- 23 Cummings, B. S., & Schnellmann, R. G. (2004). Measurement of cell death in mammalian cells.  
24 *Curr Protoc Pharmacol*, Chapter 12, Unit 12 18. doi:10.1002/0471141755.ph1208s25

- 1 De Pascalis, A., Cianciolo, G., Capelli, I., Brunori, G., & La Manna, G. (2021). SGLT2 inhibitors,  
2 sodium and off-target effects: an overview. *J Nephrol*, 34(3), 673-680. doi:10.1007/s40620-  
3 020-00845-7
- 4 DeFronzo, R. A., Norton, L., & Abdul-Ghani, M. (2017). Renal, metabolic and cardiovascular  
5 considerations of SGLT2 inhibition. *Nat Rev Nephrol*, 13(1), 11-26.  
6 doi:10.1038/nrneph.2016.170
- 7 Ding, W., Yousefi, K., Goncalves, S., Goldstein, B. J., Sabater, A. L., Kloosterboer, A., . . .  
8 Shehadeh, L. A. (2018). Osteopontin deficiency ameliorates Alport pathology by preventing  
9 tubular metabolic deficits. *JCI Insight*, 3(6). doi:10.1172/jci.insight.94818
- 10 Ducasa, G. M., Mitrofanova, A., Mallela, S. K., Liu, X., Molina, J., Sloan, A., . . . Fornoni, A. (2019).  
11 ATP-binding cassette A1 deficiency causes cardiolipin-driven mitochondrial dysfunction in  
12 podocytes. *J Clin Invest*, 129(8), 3387-3400. doi:10.1172/JCI125316
- 13 Elmore, S. (2007). Apoptosis: a review of programmed cell death. *Toxicol Pathol*, 35(4), 495-516.  
14 doi:10.1080/01926230701320337
- 15 Ferrannini, E., Baldi, S., Frascerra, S., Astiarraga, B., Heise, T., Bizzotto, R., . . . Muscelli, E.  
16 (2016). Shift to fatty substrate utilization in response to sodium-glucose cotransporter 2  
17 inhibition in subjects without diabetes and patients with type 2 diabetes. *diabetes*, 65(5),  
18 1190-1195. doi:10.2337/db15-1356
- 19 Gaborit, B., Ancel, P., Abdullah, A. E., Maurice, F., Abdesselam, I., Calen, A., . . . Dutour, A.  
20 (2021). Effect of empagliflozin on ectopic fat stores and myocardial energetics in type 2  
21 diabetes: the EMPACEF study. *Cardiovasc Diabetol*, 20(1), 57. doi:10.1186/s12933-021-  
22 01237-2
- 23 Ge, M., Molina, J., Ducasa, G. M., Mallela, S. K., Santos, J. V., Mitrofanova, A., . . . Fornoni, A.  
24 (2021). APOL1 risk variants affect podocyte lipid homeostasis and energy production in  
25 focal segmental glomerulosclerosis. *Hum Mol Genet*. doi:10.1093/hmg/ddab022

- 1 Gross, O., Kashtan, C. E., Rheault, M. N., Flinter, F., Savige, J., Miner, J. H., . . . Lennon, R.  
2 (2016). Advances and unmet needs in genetic, basic and clinical science in Alport  
3 syndrome: report from the 2015 International Workshop on Alport Syndrome. *Nephrol Dial*  
4 *Transplant*. doi:10.1093/ndt/gfw095
- 5 Gross, O., Licht, C., Anders, H. J., Hoppe, B., Beck, B., Tonshoff, B., . . . Weber, M. (2012). Early  
6 angiotensin-converting enzyme inhibition in Alport syndrome delays renal failure and  
7 improves life expectancy. *Kidney Int*, 81(5), 494-501. doi:10.1038/ki.2011.407
- 8 Grunfeld, J. P. (2000). Contemporary diagnostic approach in Alport's syndrome. *Ren Fail*, 22(6),  
9 759-763.
- 10 Guzman, J., Jauregui, A. N., Merscher-Gomez, S., Maignel, D., Muresan, C., Mitrofanova, A., . .  
11 . Forni, A. (2014). Podocyte-specific GLUT4-deficient mice have fewer and larger  
12 podocytes and are protected from diabetic nephropathy. *Diabetes*, 63(2), 701-714.  
13 doi:10.2337/db13-0752
- 14 Heerspink, H. J. L., Stefansson, B. V., Correa-Rotter, R., Chertow, G. M., Greene, T., Hou, F. F.,  
15 . . . Investigators. (2020). Dapagliflozin in patients with chronic kidney disease. *N Engl J*  
16 *Med*, 383(15), 1436-1446. doi:10.1056/NEJMoa2024816
- 17 Huang, C., & Freter, C. (2015). Lipid metabolism, apoptosis and cancer therapy. *Int J Mol Sci*,  
18 16(1), 924-949. doi:10.3390/ijms16010924
- 19 Jat, P. S., Noble, M. D., Ataliotis, P., Tanaka, Y., Yannoutsos, N., Larsen, L., & Kioussis, D.  
20 (1991). Direct derivation of conditionally immortal cell lines from an H-2Kb-tsA58 transgenic  
21 mouse. *Proc Natl Acad Sci U S A*, 88(12), 5096-5100. doi:10.1073/pnas.88.12.5096
- 22 Kang, H. M., Ahn, S. H., Choi, P., Ko, Y. A., Han, S. H., Chinga, F., . . . Susztak, K. (2015).  
23 Defective fatty acid oxidation in renal tubular epithelial cells has a key role in kidney fibrosis  
24 development. *Nat Med*, 21(1), 37-46. doi:10.1038/nm.3762
- 25 Kim, Jin-Ju, David, Judith M., Wilbon, Sydney S., Santos, Javier V., Patel, Devang M., Ahmad,  
26 Anis, . . . Forni, Alessia. (2021). Discoidin domain receptor 1 activation links extracellular

- 1 matrix to podocyte lipotoxicity in Alport syndrome. *EBioMedicine*, 63, 103162.  
2 doi:<https://doi.org/10.1016/j.ebiom.2020.103162>
- 3 Kuchay, M. S., Krishan, S., Mishra, S. K., Farooqui, K. J., Singh, M. K., Wasir, J. S., . . . Mithal,  
4 A. (2018). Effect of empagliflozin on liver fat in patients with type 2 diabetes and nonalcoholic  
5 fatty liver disease: a randomized controlled trial (E-LIFT Trial). *Diabetes Care*, 41(8), 1801-  
6 1808. doi:10.2337/dc18-0165
- 7 Liu, X., Ducasa, G. M., Mallela, S. K., Kim, J. J., Molina, J., Mitrofanova, A., . . . Fornoni, A. (2020).  
8 Sterol-O-acyltransferase-1 has a role in kidney disease associated with diabetes and Alport  
9 syndrome. *Kidney Int*, 98(5), 1275-1285. doi:10.1016/j.kint.2020.06.040
- 10 Longo, I., Porcedda, P., Mari, F., Giachino, D., Meloni, I., Deplano, C., . . . De Marchi, M. (2002).  
11 COL4A3/COL4A4 mutations: from familial hematuria to autosomal-dominant or recessive  
12 Alport syndrome. *Kidney Int*, 61(6), 1947-1956. doi:10.1046/j.1523-1755.2002.00379.x
- 13 Mabillard, H., & Sayer, J. A. (2020). SGLT2 inhibitors - a potential treatment for Alport syndrome.  
14 *Clin Sci (Lond)*, 134(4), 379-388. doi:10.1042/CS20191276
- 15 McGuire, D. K., Shih, W. J., Cosentino, F., Charbonnel, B., Cherney, D. Z. I., Dagogo-Jack, S., .  
16 . . Cannon, C. P. (2021). Association of SGLT2 inhibitors with cardiovascular and kidney  
17 outcomes in patients with type 2 diabetes: A Meta-analysis. *JAMA Cardiol*, 6(2), 148-158.  
18 doi:10.1001/jamacardio.2020.4511
- 19 Merscher-Gomez, S., Guzman, J., Pedigo, C. E., Lehto, M., Aguillon-Prada, R., Mendez, A., . . .  
20 Fornoni, A. (2013). Cyclodextrin protects podocytes in diabetic kidney disease. *Diabetes*.  
21 doi:10.2337/db13-0399
- 22 Mitrofanova, A., Molina, J., Varona Santos, J., Guzman, J., Morales, X. A., Ducasa, G. M., . . .  
23 Fornoni, A. (2018). Hydroxypropyl-beta-cyclodextrin protects from kidney disease in  
24 experimental Alport syndrome and focal segmental glomerulosclerosis. *Kidney Int*, 94(6),  
25 1151-1159. doi:10.1016/j.kint.2018.06.031



- 1 Mizoguchi, T., Edano, T., & Koshi, T. (2004). A method of direct measurement for the enzymatic  
2 determination of cholesteryl esters. *J Lipid Res*, *45*(2), 396-401. doi:10.1194/jlr.D300024-  
3 JLR200
- 4 Mundel, P., Reiser, J., Zuniga Mejia Borja, A., Pavenstadt, H., Davidson, G. R., Kriz, W., & Zeller,  
5 R. (1997). Rearrangements of the cytoskeleton and cell contacts induce process formation  
6 during differentiation of conditionally immortalized mouse podocyte cell lines. *Exp Cell Res*,  
7 *236*(1), 248-258. doi:10.1006/excr.1997.3739
- 8 Novikov, A., & Vallon, V. (2016). Sodium glucose cotransporter 2 inhibition in the diabetic kidney:  
9 an update. *Curr Opin Nephrol Hypertens*, *25*(1), 50-58.  
10 doi:10.1097/MNH.000000000000187
- 11 Osataphan, S., Macchi, C., Singhal, G., Chimene-Weiss, J., Sales, V., Kozuka, C., . . . Patti, M.  
12 E. (2019). SGLT2 inhibition reprograms systemic metabolism via FGF21-dependent and -  
13 independent mechanisms. *JCI Insight*, *4*(5). doi:10.1172/jci.insight.123130
- 14 Pedigo, C. E., Ducasa, G. M., Leclercq, F., Sloan, A., Mitrofanova, A., Hashmi, T., . . . Fornoni,  
15 A. (2016). Local TNF causes NFATc1-dependent cholesterol-mediated podocyte injury. *J*  
16 *Clin Invest*, *126*(9), 3336-3350. doi:10.1172/JCI85939
- 17 Romani, P., Brian, I., Santinon, G., Pocaterra, A., Audano, M., Pedretti, S., . . . Dupont, S. (2019).  
18 Extracellular matrix mechanical cues regulate lipid metabolism through Lipin-1 and SREBP.  
19 *Nat Cell Biol*, *21*(3), 338-347. doi:10.1038/s41556-018-0270-5
- 20 Ross, B. D., Espinal, J., & Silva, P. (1986). Glucose metabolism in renal tubular function. *Kidney*  
21 *Int*, *29*(1), 54-67. doi:10.1038/ki.1986.8
- 22 Shibuya, T., Fushimi, N., Kawai, M., Yoshida, Y., Hachiya, H., Ito, S., . . . Mori, A. (2018).  
23 Luseogliflozin improves liver fat deposition compared to metformin in type 2 diabetes  
24 patients with non-alcoholic fatty liver disease: A prospective randomized controlled pilot  
25 study. *Diabetes Obes Metab*, *20*(2), 438-442. doi:10.1111/dom.13061

- 1 Takahashi, N., Boysen, G., Li, F., Li, Y., & Swenberg, J. A. (2007). Tandem mass spectrometry  
2 measurements of creatinine in mouse plasma and urine for determining glomerular filtration  
3 rate. *Kidney Int*, 71(3), 266-271. doi:10.1038/sj.ki.5002033
- 4 Terryn, S., Jouret, F., Vandenabeele, F., Smolders, I., Moreels, M., Devuyst, O., . . . Van  
5 Kerkhove, E. (2007). A primary culture of mouse proximal tubular cells, established on  
6 collagen-coated membranes. *Am J Physiol Renal Physiol*, 293(2), F476-485.  
7 doi:10.1152/ajprenal.00363.2006
- 8 Vallon, V., Platt, K. A., Cunard, R., Schroth, J., Whaley, J., Thomson, S. C., . . . Rieg, T. (2011).  
9 SGLT2 mediates glucose reabsorption in the early proximal tubule. *J Am Soc Nephrol*,  
10 22(1), 104-112. doi:10.1681/ASN.2010030246
- 11 Vallon, V., & Thomson, S. C. (2017). Targeting renal glucose reabsorption to treat  
12 hyperglycaemia: the pleiotropic effects of SGLT2 inhibition. *Diabetologia*, 60(2), 215-225.  
13 doi:10.1007/s00125-016-4157-3
- 14 Wallenius, K., Kroon, T., Hagstedt, T., Lofgren, L., Sorhede-Winzell, M., Boucher, J., . . . Oakes,  
15 N. D. (2022). The SGLT2 inhibitor dapagliflozin promotes systemic FFA mobilization,  
16 enhances hepatic beta-oxidation, and induces ketosis. *J Lipid Res*, 63(3), 100176.  
17 doi:10.1016/j.jlr.2022.100176
- 18 Wang, X. X., Levi, J., Luo, Y., Myakala, K., Herman-Edelstein, M., Qiu, L., . . . Levi, M. (2017).  
19 SGLT2 protein expression is increased in human diabetic nephropathy: SGLT2 protein  
20 inhibition decreases renal lipid accumulation, inflammation, and the development of  
21 nephropathy in diabetic mice. *J Biol Chem*, 292(13), 5335-5348.  
22 doi:10.1074/jbc.M117.779520
- 23 Wei, D., Liao, L., Wang, H., Zhang, W., Wang, T., & Xu, Z. (2020). Canagliflozin ameliorates  
24 obesity by improving mitochondrial function and fatty acid oxidation via PPARalpha in vivo  
25 and in vitro. *Life Sci*, 247, 117414. doi:10.1016/j.lfs.2020.117414

- 1 Williamson, D. A. (1961). Alport's syndrome of hereditary nephritis with deafness. *Lancet*,  
2 2(7216), 1321-1323.
- 3 Wright, M. B., Varona Santos, J., Kemmer, C., Maugeais, C., Carralot, J. P., Roever, S., . . .  
4 Fornoni, A. (2021). Compounds targeting OSBPL7 increase ABCA1-dependent cholesterol  
5 efflux preserving kidney function in two models of kidney disease. *Nat Commun*, 12(1),  
6 4662. doi:10.1038/s41467-021-24890-3
- 7 Yokono, M., Takasu, T., Hayashizaki, Y., Mitsuoka, K., Kihara, R., Muramatsu, Y., . . . Uchiyama,  
8 Y. (2014). SGLT2 selective inhibitor ipragliflozin reduces body fat mass by increasing fatty  
9 acid oxidation in high-fat diet-induced obese rats. *Eur J Pharmacol*, 727, 66-74.  
10 doi:10.1016/j.ejphar.2014.01.040
- 11 Yoo, T. H., Pedigo, C. E., Guzman, J., Correa-Medina, M., Wei, C., Villarreal, R., . . . Merscher,  
12 S. (2015). Sphingomyelinase-like phosphodiesterase 3b expression levels determine  
13 podocyte injury phenotypes in glomerular disease. *J Am Soc Nephrol*, 26(1), 133-147.  
14 doi:10.1681/ASN.2013111213
- 15 Zhang, S., Hulver, M. W., McMillan, R. P., Cline, M. A., & Gilbert, E. R. (2014). The pivotal role of  
16 pyruvate dehydrogenase kinases in metabolic flexibility. *Nutr Metab (Lond)*, 11(1), 10.  
17 doi:10.1186/1743-7075-11-10

18

19

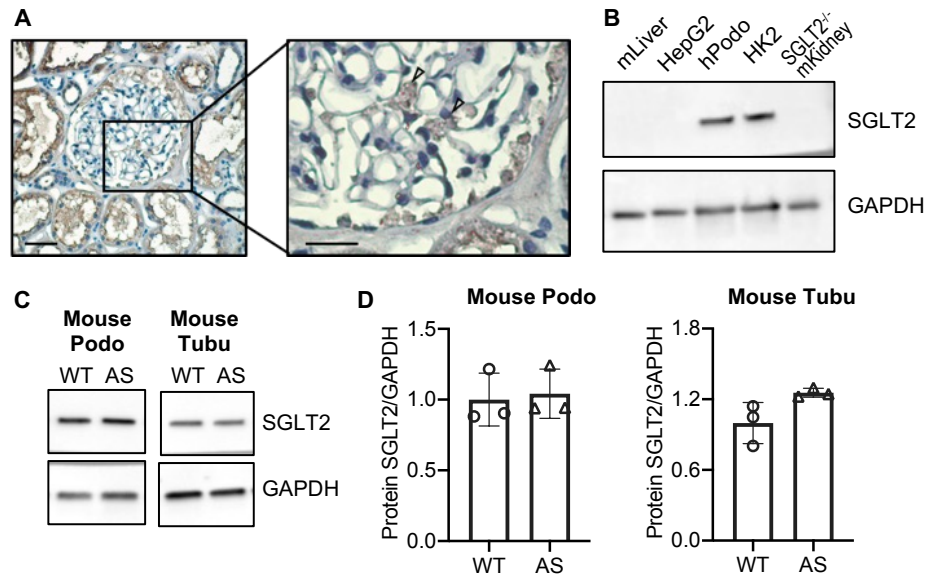

1  
2  
3 **Figure 1. SGLT2 protein is expressed in human kidney cortex and in cultured human and**  
4 **mouse podocytes. (A)** Immunohistochemistry staining of human kidney cortex for SGLT2 (left  
5 panel, scale bar: 50  $\mu$ m; right panel, scale bar: 25  $\mu$ m). **(B)** Western blot images demonstrating  
6 SGLT2 expression in cultured human podocytes (hPodo). Mouse liver lysate (mLiver), HepG2  
7 liver cancer cells and kidney lysate from SGLT2<sup>-/-</sup> mouse (SGLT2<sup>-/-</sup> mKidney) were used as the  
8 negative controls. HK2 proximal tubular cells were used as the positive control. **(C, D)** Western  
9 blot images (C) and quantification (D) demonstrating SGLT2 expression in mouse proximal  
10 tubular cells (Tubu) and podocytes (Podo) established from wildtype (WT) and Alport (AS) mice  
11 (n = 3). Two-tailed Student's t-test.

12

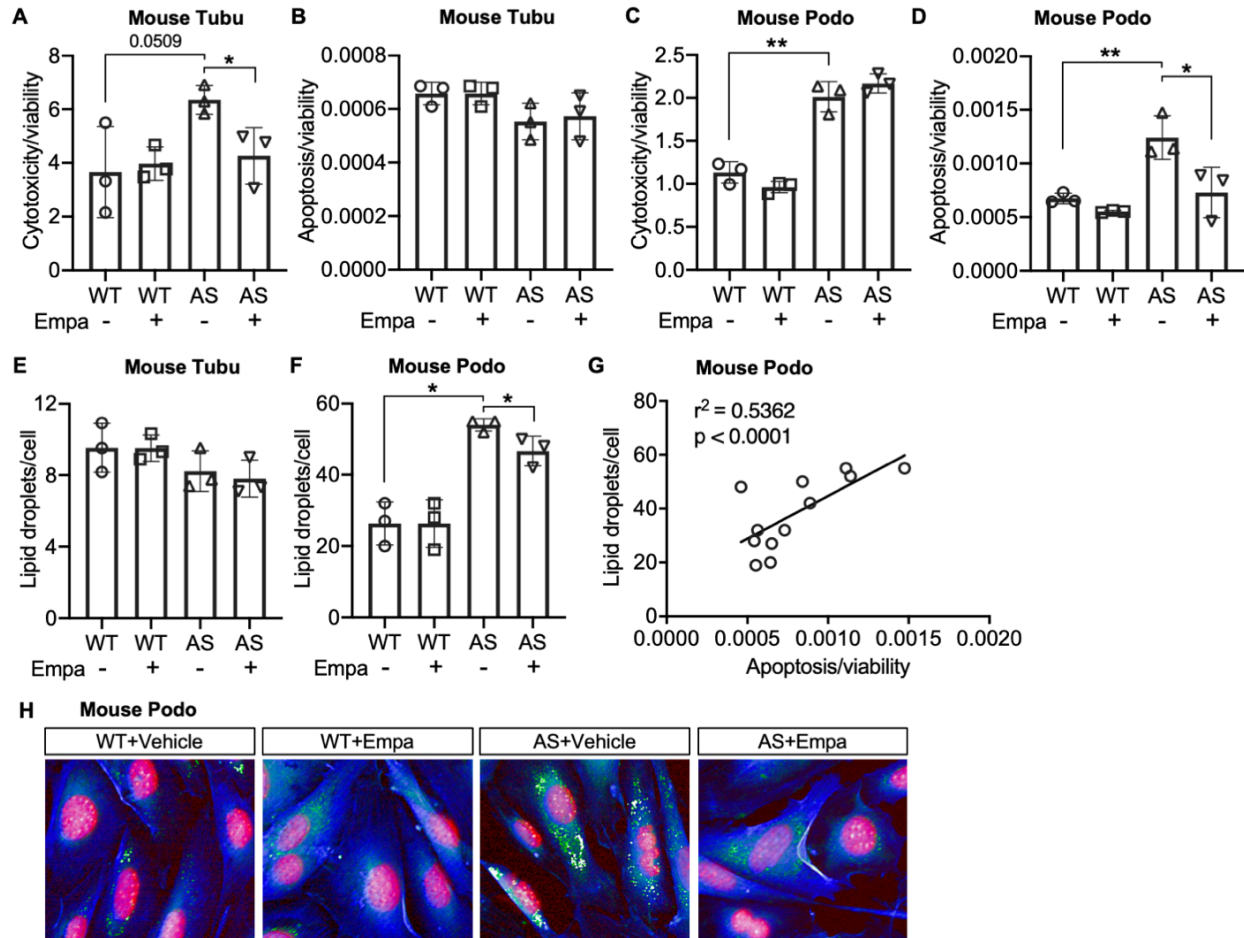

1  
2 **Figure 2. Treatment of AS podocytes with empagliflozin reduces lipid droplet (LD)**  
3 **accumulation and apoptosis. (A-D)** Immortalized podocytes and tubular cells of WT and AS  
4 mice treated with empagliflozin (Empa) or vehicle for 48 hours. **(A,C)** Bar graph analysis showing  
5 cytotoxicity normalized to viability (n = 3). **(B,D)** Bar graph analysis showing apoptosis normalized  
6 to viability (n = 3). **(E,F)** LD accumulation in tubular cells **(E)** and podocytes **(F)** was measured by  
7 Nile red staining. Bar graph analysis showing the quantification of the number of LDs per cell (n  
8 = 3). **(G)** Correlation analyses between the LD accumulation and apoptosis in podocytes (n = 12).  
9 **(H)** Representative images of Nile red staining demonstrate increased LD numbers (Nile red:  
10 green) in AS podocytes (Cell mask blue: blue; DAPI: red) compared to WT podocytes, which is  
11 reduced by Empa treatment. **A-F**, Two-tailed Student's t-test. **G**, Pearson's correlation coefficient.  
12 \* $p < 0.5$ , \*\* $p < 0.01$ .

13

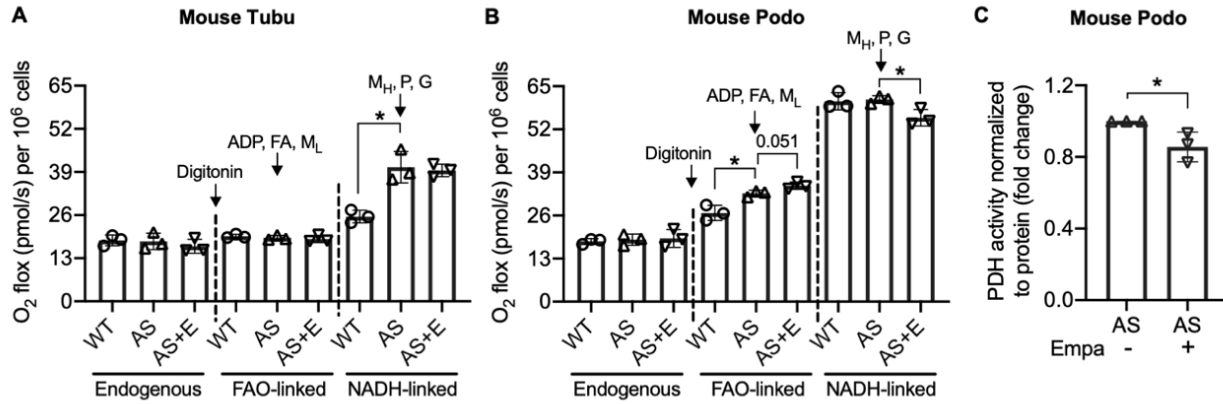

1  
2 **Figure 3. Empagliflozin inhibits the utilization of pyruvate as a metabolic substrate in AS**  
3 **podocytes. (A, B)** Bar graph analysis of endogenous and substrate-driven oxygen consumption  
4 rates in wildtype (WT) and Alport (AS) tubular cells **(A)** and podocytes **(B)** treated with or without  
5 empagliflozin (E) (n = 3). The sequential addition of permeabilizing agent and substrates was  
6 labeled in the figure. **(C)** Pyruvate dehydrogenase (PDH) activity was measured by a colorimetric  
7 assay in protein extracts from AS podocytes, normalized to protein concentration (n = 3). Two-  
8 tailed Student's t-test, \**p* < 0.5. FA: octanoylcarnitine; M<sub>L</sub>: malate-low concentration; M<sub>H</sub>: malate-  
9 high concentration; P: pyruvate; G: glutamate.

10

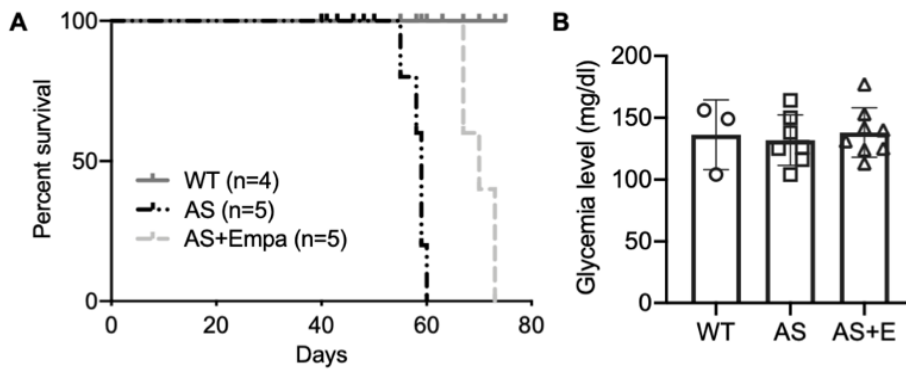

1

2 **Figure 4. Empa improves the survival of AS mice.** (A) Survival curve (n = 4-5) of AS mice fed  
3 empagliflozin-supplemented (E) chow versus placebo diet starting at 4 weeks of age, compared  
4 to age-matched WT control mice. (B) Glycemia levels of WT and AS mice fed placebo diet and  
5 AS mice fed empagliflozin chow (n = 3-7). B, AS vs AS+E: Two-tailed Student's t-test.

6

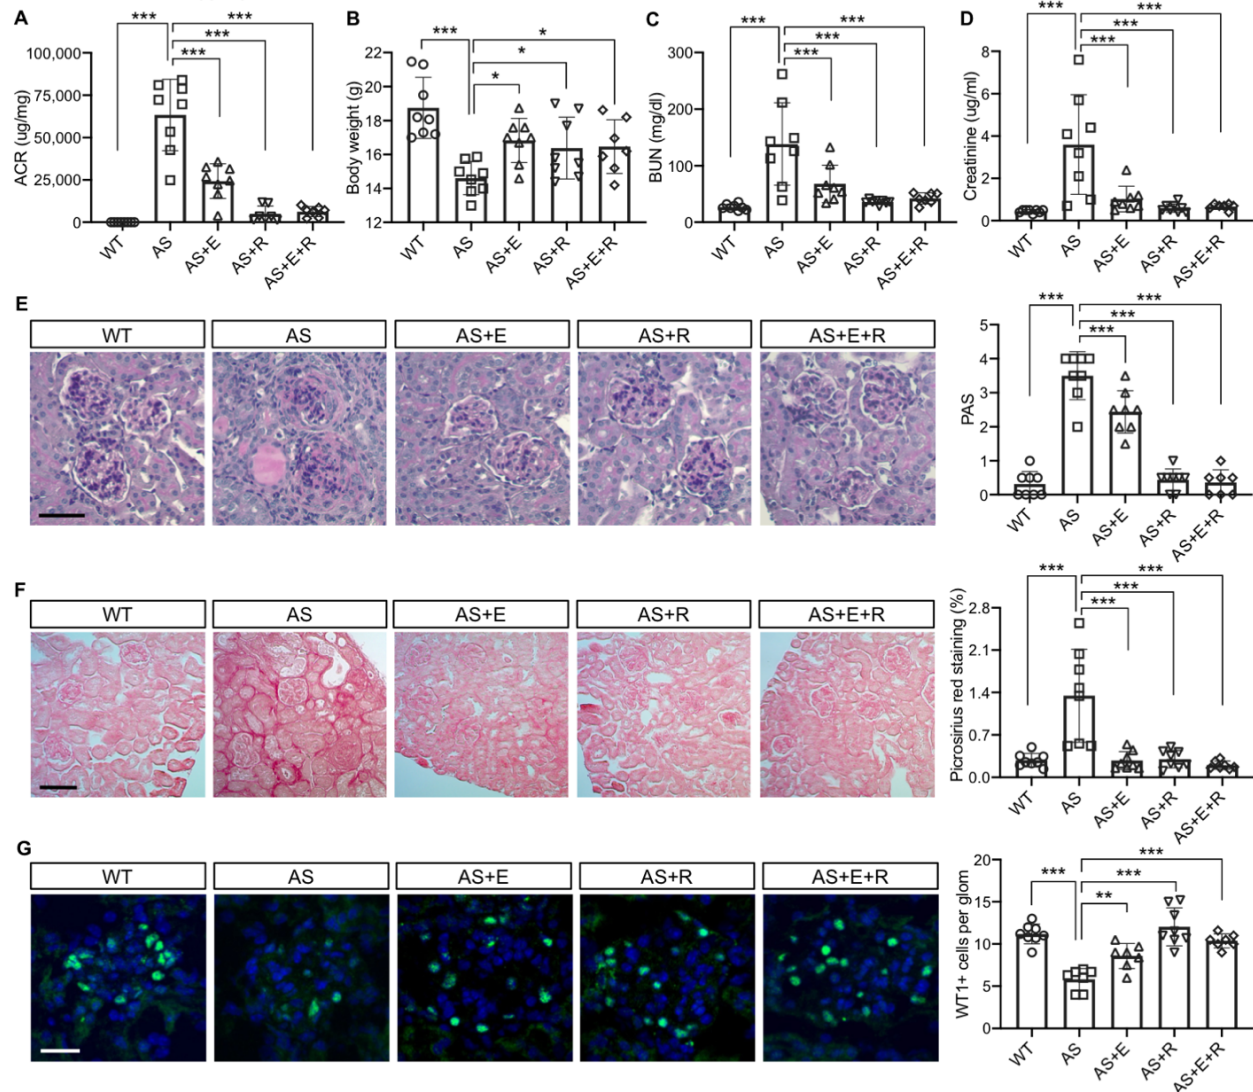

1

2 **Figure 5. Empagliflozin improves renal function in a mouse model of Alport syndrome. (A)**

3 Urinary albumin-to-creatinine ratio (ACR) in WT and AS mice fed with placebo, empagliflozin (E),  
4 ramipril (R), or the combination of empagliflozin and ramipril (E+R). Urines were collected at the

5 time of sacrifice (n = 7-8). **(B)** Bar graph analysis of body weights of mice from all experimental

6 groups. **(C,D)** Bar graph analysis of blood urea nitrogen (BUN) **(C)** and creatinine **(D)** levels of

7 mice from all experimental groups (n = 7-8). **(E)** Representative images of Periodic acid-Schiff

8 (PAS) staining and bar graph analysis showing the mesangial expansion score of kidney cortices

9 sections (scale bar: 50  $\mu\text{m}$ ; n = 7-8). **(F)** Representative Picrosirius red staining and bar graph



1 analysis showing the quantification of fibrosis in kidney cortices sections (scale bar: 100  $\mu\text{m}$ ; n=  
2 7-8). **(G)** Representative images of kidney cortices stained with WT1 (green) to detect podocytes  
3 and DAPI (blue) to reveal nuclei and bar graph quantification of the average number of WT1-  
4 positive podocytes per glomerulus (scale bar: 25  $\mu\text{m}$ , n = 7-8). One-Way ANOVA followed by  
5 Holm-Sidak's multiple comparison. \* $p < 0.05$ , \*\* $p < 0.01$ , \*\*\* $p < 0.001$ .

6

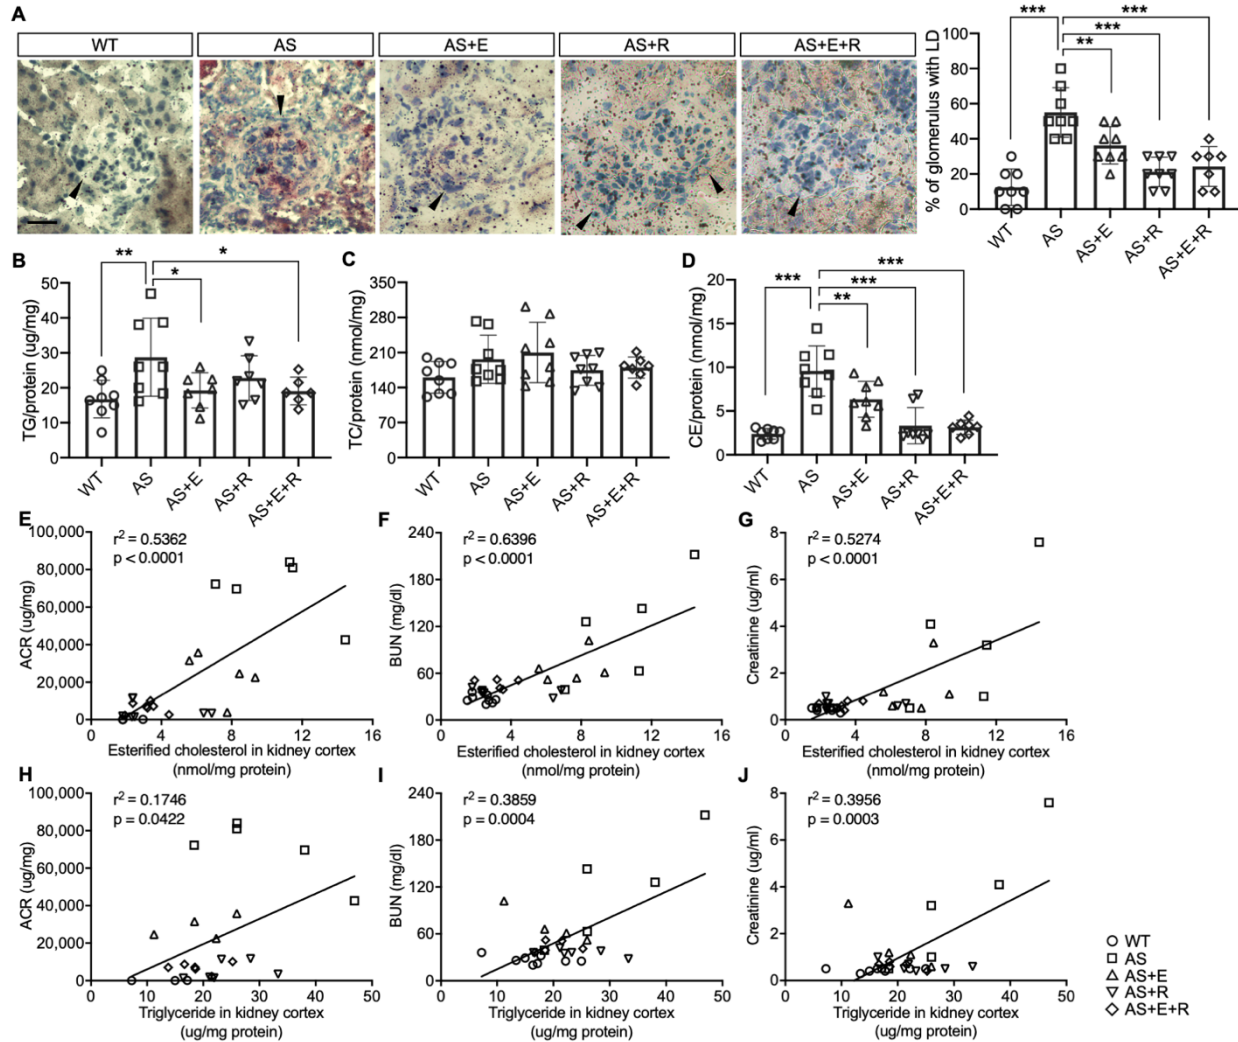

1  
2 **Figure 6. Empagliflozin prevents renal lipid accumulation in experimental Alport**  
3 **syndrome. (A)** Representative Oil Red-O (ORO) images of stained kidney cortices sections  
4 (scale bar: 20  $\mu$ m) and bar graph quantification of the number of glomeruli with lipid droplets (LD)  
5 in ORO-stained slides (n = 7-8). **(B-D)** Bar graph analysis of triglyceride (TG, **B**), total cholesterol  
6 (TC, **C**), and cholesterol ester (CE, **D**) contents in kidney cortices. Values are normalized to  
7 protein concentrations (n = 6-8). **(E-G)** Correlation analyses between the CE content of kidney  
8 cortices and Triglyceride, ACR, BUN or creatinine (n = 27, 31, 31). **(H-J)** Correlation analyses between the TG  
9 content of kidney cortices and ACR, BUN or creatinine (n = 29, 29, 29). **A-D**, One-Way ANOVA

- 1 followed by Holm-Sidak's multiple comparison. **E-J**, Pearson's correlation coefficient. \* $p < 0.05$ ,
- 2 \*\* $p < 0.01$ , \*\*\* $p < 0.001$ .
- 3

1 **SUPPLEMENTAL FIGURES**

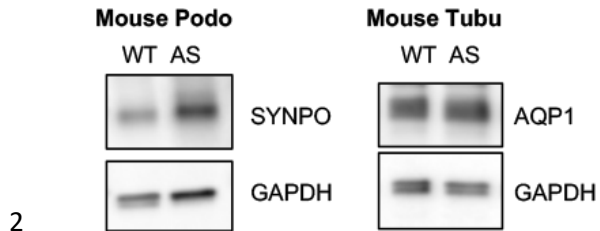

3 **Figure 1 - Figure supplement 1.** Podocyte-specific marker Synaptopodin (SYNPO) and tubule-  
4 specific marker Aquaporin 1 (AQP1) was confirmed in podocyte and tubular cell lines, respectively.

5

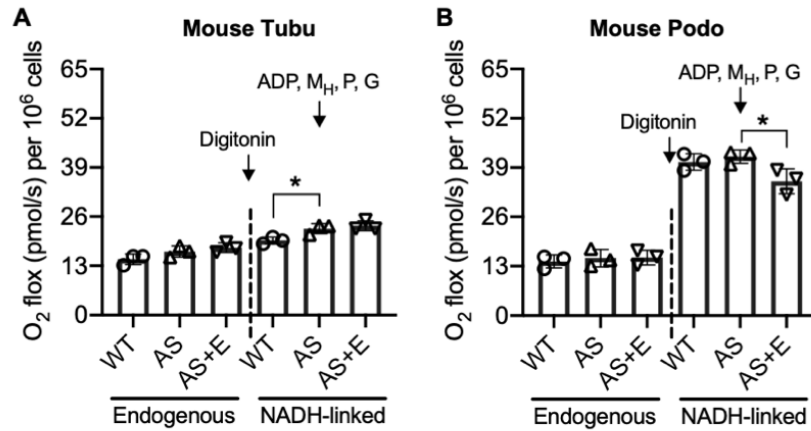

1

2 **Figure 3 - Figure supplement 1.** Empagliflozin inhibits NADH-linked oxygen consumption rate

3 in AS podocytes. (A, B) Bar graph analysis of endogenous and substrate-driven oxygen

4 consumption rates in wildtype (WT) and Alport (AS) tubular cells (A) and podocytes (B) treated

5 with or without empagliflozin (E) (n=3). The sequential addition of permeabilizing agent and

6 substrates was labeled in the figure. Two-tailed Student's t-test, \**p* < 0.5. M<sub>H</sub>: malate-high

7 concentration; P: pyruvate; G: glutamate.
